# Supplementary material for: A community approach of pathogens and their arthropod vectors (ticks and fleas) in dogs of African Sub-Sahara
Source: PubMed Central journal article supplement (PMC8594167; doi:10.1186/s13071-021-05014-8), 2021-11-16
Supplement: 13071_2021_5014_MOESM2_ESM.pdf [file 13071_2021_5014_MOESM2_ESM.pdf]

|              |                                                 |                           |
|--------------|-------------------------------------------------|---------------------------|
| <b>DCF 1</b> | <b>FIELD ASSESSMENT<br/>(Individual animal)</b> | (Fix barcode in this box) |
|--------------|-------------------------------------------------|---------------------------|

Time = 24 hour clock

Date format dd/mmm/yyyy

|                                                                                                                                                                                                                                     |                                                                                                                                             |                                                                                                                                                                     |                                                                       |                                                                                                                                           |                                                                                                                                                                                      |
|-------------------------------------------------------------------------------------------------------------------------------------------------------------------------------------------------------------------------------------|---------------------------------------------------------------------------------------------------------------------------------------------|---------------------------------------------------------------------------------------------------------------------------------------------------------------------|-----------------------------------------------------------------------|-------------------------------------------------------------------------------------------------------------------------------------------|--------------------------------------------------------------------------------------------------------------------------------------------------------------------------------------|
| Date                                                                                                                                                                                                                                |                                                                                                                                             | Time                                                                                                                                                                |                                                                       | Animal no.                                                                                                                                |                                                                                                                                                                                      |
| <b>Owner consent, animal details and history: <input type="radio"/> Dog <input type="radio"/> Cat to participate in survey</b>                                                                                                      |                                                                                                                                             |                                                                                                                                                                     |                                                                       |                                                                                                                                           |                                                                                                                                                                                      |
| Owner : I give mermission for my animal to participate (as per information sheet):                                                                                                                                                  |                                                                                                                                             | Signature:                                                                                                                                                          |                                                                       | Date:                                                                                                                                     |                                                                                                                                                                                      |
| Age (months)                                                                                                                                                                                                                        | Breed                                                                                                                                       | Sex                                                                                                                                                                 |                                                                       | <input type="radio"/> Male                                                                                                                | <input type="radio"/> Female                                                                                                                                                         |
| Diet                                                                                                                                                                                                                                | <input type="radio"/> Homemade <input type="radio"/> Tinned                                                                                 |                                                                                                                                                                     | <input type="radio"/> Kibble <input type="radio"/> Mixed              |                                                                                                                                           |                                                                                                                                                                                      |
| Last deworming:                                                                                                                                                                                                                     | <input type="radio"/> Never <input type="radio"/> 1-6 months ago<br><input type="radio"/> < 1 month ago <input type="radio"/> >6 months ago |                                                                                                                                                                     | Dewormer used:                                                        |                                                                                                                                           |                                                                                                                                                                                      |
| Last ectoparasiticide                                                                                                                                                                                                               | <input type="radio"/> Never <input type="radio"/> 1-6 months ago<br><input type="radio"/> < 1 month ago <input type="radio"/> >6 months ago |                                                                                                                                                                     | Ectoparasiticide used:                                                |                                                                                                                                           |                                                                                                                                                                                      |
| Last vaccination                                                                                                                                                                                                                    | <input type="radio"/> Never <input type="radio"/> Within last 3 years<br><input type="radio"/> Within last year                             |                                                                                                                                                                     | Vaccines used:                                                        |                                                                                                                                           | <input type="checkbox"/> Rabies <input type="checkbox"/> Leptospira<br><input type="checkbox"/> DHP <input type="checkbox"/> CPi/Bordetella<br><input type="checkbox"/> Other: _____ |
| Housing                                                                                                                                                                                                                             | <input type="radio"/> Indoor <input type="radio"/> Free roaming <input type="radio"/> Yard                                                  |                                                                                                                                                                     | Other pets?                                                           |                                                                                                                                           | <input type="radio"/> Yes <input type="radio"/> No                                                                                                                                   |
| If "yes" to "Other pets": Cats or dogs and how many?                                                                                                                                                                                |                                                                                                                                             |                                                                                                                                                                     | <input type="radio"/> Dog(s) _____ <input type="radio"/> Cat(s) _____ |                                                                                                                                           |                                                                                                                                                                                      |
| <b>Geographical details</b>                                                                                                                                                                                                         |                                                                                                                                             |                                                                                                                                                                     |                                                                       |                                                                                                                                           |                                                                                                                                                                                      |
| Pet origin (name of city/town/village)                                                                                                                                                                                              |                                                                                                                                             | GPS coordinates of sampling site                                                                                                                                    |                                                                       |                                                                                                                                           |                                                                                                                                                                                      |
| <b>Physical examination and general health assessment</b>                                                                                                                                                                           |                                                                                                                                             |                                                                                                                                                                     |                                                                       |                                                                                                                                           |                                                                                                                                                                                      |
| Any major abnormal clinical signs evident?                                                                                                                                                                                          |                                                                                                                                             | <input type="radio"/> Yes <input type="radio"/> No                                                                                                                  |                                                                       | If yes, provide details below:                                                                                                            |                                                                                                                                                                                      |
|                                                                                                                                                                                                                                     |                                                                                                                                             |                                                                                                                                                                     |                                                                       |                                                                                                                                           |                                                                                                                                                                                      |
| Body Condition Score                                                                                                                                                                                                                | <input type="radio"/> 1 <input type="radio"/> 2 <input type="radio"/> 3 <input type="radio"/> 4 <input type="radio"/> 5                     |                                                                                                                                                                     | Mucous membrane colour                                                | <input type="radio"/> Normal (pink & moist) <input type="radio"/> Pale <input type="radio"/> Icteric<br><input type="radio"/> Other _____ |                                                                                                                                                                                      |
| Temperature (°C)                                                                                                                                                                                                                    | Pulse (beats/minute)                                                                                                                        |                                                                                                                                                                     | Respiration rate (/minute)                                            |                                                                                                                                           |                                                                                                                                                                                      |
| <b>Ectoparasite assessments</b>                                                                                                                                                                                                     |                                                                                                                                             |                                                                                                                                                                     |                                                                       |                                                                                                                                           |                                                                                                                                                                                      |
| <b>Ticks</b>                                                                                                                                                                                                                        | Area 1                                                                                                                                      | <input type="radio"/> 1 ticks <input type="radio"/> 2 ticks <input type="radio"/> ≥ 3 ticks                                                                         |                                                                       | 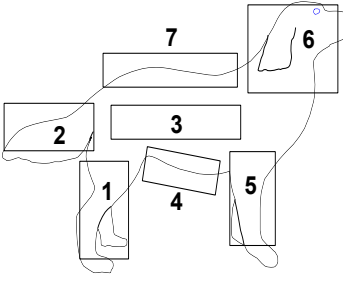                                                      |                                                                                                                                                                                      |
|                                                                                                                                                                                                                                     | Area 2                                                                                                                                      | <input type="radio"/> 1 ticks <input type="radio"/> 2 ticks <input type="radio"/> ≥ 3 ticks                                                                         |                                                                       |                                                                                                                                           |                                                                                                                                                                                      |
|                                                                                                                                                                                                                                     | Area 3                                                                                                                                      | <input type="radio"/> 1 ticks <input type="radio"/> 2 ticks <input type="radio"/> ≥ 3 ticks                                                                         |                                                                       |                                                                                                                                           |                                                                                                                                                                                      |
|                                                                                                                                                                                                                                     | Area 4                                                                                                                                      | <input type="radio"/> 1 ticks <input type="radio"/> 2 ticks <input type="radio"/> ≥ 3 ticks                                                                         |                                                                       |                                                                                                                                           |                                                                                                                                                                                      |
|                                                                                                                                                                                                                                     | Area 5                                                                                                                                      | <input type="radio"/> 1 ticks <input type="radio"/> 2 ticks <input type="radio"/> ≥ 3 ticks                                                                         |                                                                       |                                                                                                                                           |                                                                                                                                                                                      |
|                                                                                                                                                                                                                                     | Area 6                                                                                                                                      | <input type="radio"/> 1 ticks <input type="radio"/> 2 ticks <input type="radio"/> ≥ 3 ticks                                                                         |                                                                       |                                                                                                                                           |                                                                                                                                                                                      |
|                                                                                                                                                                                                                                     | Area 7                                                                                                                                      | <input type="radio"/> 1 ticks <input type="radio"/> 2 ticks <input type="radio"/> ≥ 3 ticks                                                                         |                                                                       |                                                                                                                                           |                                                                                                                                                                                      |
| Fleas                                                                                                                                                                                                                               | Overall                                                                                                                                     | <input type="radio"/> 1-10 fleas <input type="radio"/> 11-50 fleas <input type="radio"/> >50 fleas                                                                  |                                                                       |                                                                                                                                           |                                                                                                                                                                                      |
| Lice                                                                                                                                                                                                                                | Overall                                                                                                                                     | <input type="radio"/> 1-10 lice <input type="radio"/> 11-50 lice <input type="radio"/> >50 lice                                                                     |                                                                       |                                                                                                                                           |                                                                                                                                                                                      |
| <b>Ectoparasite specimen collection (single jar with 70% ethanol per animal)</b>                                                                                                                                                    |                                                                                                                                             |                                                                                                                                                                     |                                                                       |                                                                                                                                           |                                                                                                                                                                                      |
| Up to 30 ticks collected:                                                                                                                                                                                                           |                                                                                                                                             | <input type="radio"/> Yes <input type="radio"/> No                                                                                                                  |                                                                       | Fleas and lice: <input type="radio"/> Collected as many as possible <input type="radio"/> None present                                    |                                                                                                                                                                                      |
| Ensured that the barcode on the collection jar corresponds with barcode on this form                                                                                                                                                |                                                                                                                                             |                                                                                                                                                                     |                                                                       |                                                                                                                                           | <input type="radio"/> Yes                                                                                                                                                            |
| <b>Blood collection and processing and anal swab preparation</b>                                                                                                                                                                    |                                                                                                                                             |                                                                                                                                                                     |                                                                       |                                                                                                                                           |                                                                                                                                                                                      |
| Blood specimen collected                                                                                                                                                                                                            | <input type="radio"/> Yes <input type="radio"/> No                                                                                          |                                                                                                                                                                     | FTA card used                                                         | <input type="radio"/> Yes <input type="radio"/> No                                                                                        |                                                                                                                                                                                      |
| 4Dx Plus kit used                                                                                                                                                                                                                   |                                                                                                                                             | <input type="radio"/> Yes <input type="radio"/> No                                                                                                                  |                                                                       |                                                                                                                                           |                                                                                                                                                                                      |
| 4Dx Plus kit positive results: <input type="checkbox"/> Heartworm <input type="checkbox"/> <i>Borrelia burgdorferi</i> (Lyme disease) <input type="checkbox"/> <i>Anaplasma</i> spp. <input type="checkbox"/> <i>Ehrlichia</i> spp. |                                                                                                                                             |                                                                                                                                                                     |                                                                       |                                                                                                                                           |                                                                                                                                                                                      |
| Serum prepared                                                                                                                                                                                                                      | <input type="radio"/> Yes <input type="radio"/> No                                                                                          |                                                                                                                                                                     | Anal swab performed                                                   |                                                                                                                                           | <input type="radio"/> Yes <input type="radio"/> No                                                                                                                                   |
| Rabies vaccine administered?                                                                                                                                                                                                        | <input type="radio"/> Yes <input type="radio"/> No                                                                                          |                                                                                                                                                                     | Ectoparasite preventive dispensed?                                    |                                                                                                                                           | <input type="radio"/> Yes <input type="radio"/> No                                                                                                                                   |
| Field assessment performed by:                                                                                                                                                                                                      |                                                                                                                                             | Signature                                                                                                                                                           |                                                                       | Date:                                                                                                                                     |                                                                                                                                                                                      |
| <b>Preparation for shipment checklist</b>                                                                                                                                                                                           |                                                                                                                                             |                                                                                                                                                                     |                                                                       |                                                                                                                                           |                                                                                                                                                                                      |
| Following was prepared for shipment to Clinvet:                                                                                                                                                                                     |                                                                                                                                             | <input type="checkbox"/> DCF 1 <input type="checkbox"/> FTA card (one half) <input type="checkbox"/> Ectoparasite collection jar <input type="checkbox"/> Anal swab |                                                                       |                                                                                                                                           |                                                                                                                                                                                      |
| Prepared for shipment by:                                                                                                                                                                                                           |                                                                                                                                             | Signature                                                                                                                                                           |                                                                       | Date:                                                                                                                                     |                                                                                                                                                                                      |
